# Supplementary material for: Comparative Atomistic Insights on Apo and ATP-I1171N/S/T in Nonsmall-Cell Lung Cancer
Source: PubMed Central journal article supplement — ACS Omega. 2023 Nov 6;8(46):43856–72. doi: 10.1021/acsomega.3c05785 (PMC10666221; doi:10.1021/acsomega.3c05785), 2023-11-06
Supplement: ao3c05785_si_001.pdf [file ao3c05785_si_001.pdf]

**Supporting Information for:**

**Comparative Atomistic Insights on Apo and ATP-I1171N/S/T in Nonsmall-Cell Lung Cancer**

**Ambritha Balasundaram and George Priya C Doss \***

Laboratory of Integrative Genomics, Department of Integrative Biology, School of BioSciences and Technology, Vellore Institute of Technology, Vellore, Tamil Nadu 632014, India; ambritha.b2020@vitstudent.ac.in (AB); ORCID iD: <https://orcid.org/0000-0003-2856-4687>; georgepriyadoss@vit.ac.in (CGPD); ORCID iD: <https://orcid.org/0000-0002-5971-8290>

\*Correspondence: George Priya C Doss, Laboratory of Integrative Genomics, Department of Integrative Biology, School of Biosciences and Technology, Vellore Institute of Technology, Vellore, India; georgepriyadoss@vit.ac.in

**Contents:**

**Supplementary Table 1.** The binding energy and distance between the Mg & ATP of the ATP-bounded ALK WT and I1171N/S/T mutations in all conformations in triplicates. Where T1, T2, and T3 represent triplicate 1, triplicate 2, and triplicate 3. '\*' denoted conformation was selected for further process. ....S4 - S6

**Supplementary Figure 1.** The intramolecular hydrogen bond analysis of ALK WT and I1171N/S/T mutations in Apo and ATP bound states. The intramolecular hydrogen bond analysis for (A) WT-Apo showed in black, (B) WT-ATP showed in navy blue, (C) I1171N-Apo showed in green, (D) I1171N-ATP showed in pear, (E) I1171S-Apo showed in mustard, (F) I1171S-ATP showed in cyan, (G) I1171T-Apo showed in red, and (H) I1171T-ATP showed in orange. The X-axis denotes time in ns, and the Y-axis displays H-bonds in number. ....S7

**Supplementary Figure 2.** The distance between the Y1278 and C1097 of ALK WT and I1171N/S/T mutations in Apo and ATP bound states throughout the MD trajectories. The distance between the Y1278-C1097 for (A) WT-Apo, (B) WT-ATP, (C) I1171N-Apo, (D) I1171N-ATP, (E) I1171S-Apo, (F) I1171S-ATP, (G) I1171T-Apo, and (H) I1171T-ATP. The X-axis denotes time in ps, and the Y-axis displays distance in Å. ....S8

**Supplementary Figure 3.** The H-bonds formed between the Y1278-C1097 of ALK WT and I1171N/S/T mutations in Apo and ATP bound states. The h-bonds formed between the Y1278-C1097 for (A) WT-Apo, (B) WT-ATP, (C) I1171N-Apo, (D) I1171N-ATP, (E) I1171S-Apo, (F) I1171S-ATP, (G) I1171T-Apo, and (H) I1171T-ATP. The X-axis denotes time in ps, and the Y-axis displays the number of h-bonds formed. ...S9

**Supplementary Figure 4.** The salt bridge distance between E1167-K1150 of ALK WT and I1171N/S/T mutations in Apo and ATP bound states throughout the MD trajectories. The salt-bridge distance between the E1167-K1150 for (A) WT-Apo, (B) WT-ATP, (C) I1171N-Apo, (D) I1171N-ATP, (E) I1171S-Apo, (F) I1171S-ATP, (G) I1171T-Apo, and (H) I1171T-ATP. The X-axis denotes time in ps, and the Y-axis displays distance in Å. ....S10

**Supplementary Figure 5.** The H-bonds formed between the E1167-K1150 of ALK WT and I1171N/S/T mutations in Apo and ATP bound states. The h-bond formed between the E1167-K1150 for (A) WT-Apo, (B) WT-ATP, (C) I1171N-Apo, (D) I1171N-ATP, (E) I1171S-Apo, (F) I1171S-ATP, (G) I1171T-Apo, and (H) I1171T-ATP. The X-axis denotes time in ps, and the Y-axis displays the number of h-bonds formed. ...S11

**Supplementary Figure 6.** The cartoon illustration of snapshots of the structures were extracted from trajectories at 100ns intervals of the ALK WT and I1171N/S/T mutations in Apo and ATP bound states over the entire simulations. ....S12

**Supplementary Figure 7.** The overall percentage of secondary structures for ALK WT and I1171N/S/T mutations in Apo and ATP bound states. The structure includes A-helix, B-sheet, B-bridge, and Turn. ....S13

**Supplementary Table 1.** The binding energy and distance between the Mg & ATP of the ATP-bounded ALK WT and I1171N/S/T mutations in all conformations in triplicates. Where T1, T2, and T3 represent triplicate 1, triplicate 2, and triplicate 3. '\*' denoted conformation was selected for further process.

| <b>ALK-WT-ATP1-T1</b>     | <b>Conformation</b> | <b>Distance (Å) Mg - ATP</b> | <b>Binding energy (kcal/mol)</b> |
|---------------------------|---------------------|------------------------------|----------------------------------|
|                           | 1*                  | 5.551                        | -5.9                             |
|                           | 2                   | 11.346                       | -5.9                             |
|                           | 3                   | 12.382                       | -5.9                             |
|                           | 4                   | 5.899                        | -5.9                             |
|                           | 5                   | 10.687                       | -5.9                             |
|                           | 6                   | 11.426                       | -5.8                             |
|                           | 7                   | 9.348                        | -5.8                             |
|                           | 8                   | 12.367                       | -5.8                             |
|                           | 9                   | 7.366                        | -5.8                             |
| <b>ALK-WT-ATP1-T2</b>     |                     |                              |                                  |
|                           | 1*                  | 5.536                        | -6                               |
|                           | 2                   | 9.055                        | -5.8                             |
|                           | 3                   | 11.909                       | -5.8                             |
|                           | 4                   | 13.724                       | -5.8                             |
|                           | 5                   | 7.605                        | -5.8                             |
|                           | 6                   | 10.217                       | -5.7                             |
|                           | 7                   | 6.864                        | -5.6                             |
|                           | 8                   | 12.21                        | -5.6                             |
|                           | 9                   | 9.824                        | -5.6                             |
| <b>ALK-WT-ATP1-T3</b>     |                     |                              |                                  |
|                           | 1                   | 11.827                       | -6.6                             |
|                           | 2                   | 11.706                       | -6.6                             |
|                           | 3                   | 11.598                       | -6.6                             |
|                           | 4                   | 12.346                       | -6.5                             |
|                           | 5                   | 9.44                         | -6.5                             |
|                           | 6*                  | 5.881                        | -6.4                             |
|                           | 7                   | 10.689                       | -6.4                             |
|                           | 8                   | 12.42                        | -6.3                             |
|                           | 9                   | 8.887                        | -6.3                             |
| <b>ALK-I1171T-ATP1-T1</b> |                     |                              |                                  |
|                           | 1                   | 6.861                        | -6.5                             |
|                           | 2*                  | 3.179                        | -6.5                             |
|                           | 3                   | 10.099                       | -6.5                             |
|                           | 4                   | 7.158                        | -6.3                             |
|                           | 5                   | 7.557                        | -6.3                             |
|                           | 6                   | 7.153                        | -6.3                             |
|                           | 7                   | 3.385                        | -6.2                             |

|                           |    |        |      |
|---------------------------|----|--------|------|
|                           | 8  | 8.66   | -6.1 |
|                           | 9  | 9.19   | -6.1 |
| <b>ALK-I1171T-ATP1-T2</b> |    |        |      |
|                           | 1  | 7.07   | -6.6 |
|                           | 2  | 6.926  | -6.6 |
|                           | 3* | 2.239  | -6.5 |
|                           | 4  | 9.952  | -6.4 |
|                           | 5  | 3.717  | -6.2 |
|                           | 6  | 3.72   | -6.2 |
|                           | 7  | 7.01   | -6.2 |
|                           | 8  | 7.317  | -6.2 |
|                           | 9  | 7.045  | -6.1 |
| <b>ALK-I1171T-ATP1-T3</b> |    |        |      |
|                           | 1  | 13.554 | -6.6 |
|                           | 2* | 5.065  | -6.6 |
|                           | 3  | 8.234  | -6.5 |
|                           | 4  | 14.275 | -6.5 |
|                           | 5  | 8.339  | -6.5 |
|                           | 6  | 6.15   | -6.4 |
|                           | 7  | 7.823  | -6.4 |
|                           | 8  | 5.101  | -6.4 |
|                           | 9  | 11.269 | -6.3 |
| <b>ALK-I1171S-ATP1-T1</b> |    |        |      |
|                           | 1* | 5.061  | -6.1 |
|                           | 2  | 7.78   | -6.1 |
|                           | 3  | 8.208  | -6.1 |
|                           | 4  | 8.103  | -6   |
|                           | 5  | 8.342  | -6   |
|                           | 6  | 13.632 | -6   |
|                           | 7  | 10.904 | -5.9 |
|                           | 8  | 6.299  | -5.9 |
|                           | 9  | 7.276  | -5.8 |
| <b>ALK-I1171S-ATP1-T2</b> |    |        |      |
|                           | 1  | 13.484 | -6.3 |
|                           | 2  | 10.306 | -6.3 |
|                           | 3* | 5.107  | -6.3 |
|                           | 4  | 8.091  | -6.2 |
|                           | 5  | 12.973 | -6.2 |
|                           | 6  | 6.271  | -6.2 |
|                           | 7  | 13.586 | -6.2 |
|                           | 8  | 13.593 | -6.1 |
|                           | 9  | 8.518  | -6.1 |
| <b>ALK-I1171S-ATP1-T3</b> |    |        |      |
|                           | 1  | 13.554 | -6.5 |
|                           | 2* | 5.065  | -6.2 |
|                           | 3  | 8.234  | -6.2 |

|                           |    |        |      |
|---------------------------|----|--------|------|
|                           | 4  | 14.275 | -6.1 |
|                           | 5  | 8.339  | -6.1 |
|                           | 6  | 6.15   | -6.1 |
|                           | 7  | 7.823  | -6   |
|                           | 8  | 5.101  | -6   |
|                           | 9  | 11.269 | -6   |
| <b>ALK-I1171N-ATP1-T1</b> |    |        |      |
|                           | 1  | 7.743  | -6.4 |
|                           | 2  | 9.348  | -6   |
|                           | 3  | 9.317  | -5.9 |
|                           | 4* | 6.098  | -5.8 |
|                           | 5  | 5.759  | -5.6 |
|                           | 6  | 9.109  | -5.6 |
|                           | 7  | 5.149  | -4.9 |
|                           | 8  | 9.249  | -4.8 |
|                           | 9  | 8.439  | -4.7 |
| <b>ALK-I1171N-ATP1-T2</b> |    |        |      |
|                           | 1* | 4.821  | -6.9 |
|                           | 2  | 7.747  | -6.3 |
|                           | 3  | 10.616 | -6   |
|                           | 4  | 9.538  | -6   |
|                           | 5  | 5.973  | -5.7 |
|                           | 6  | 9.288  | -5.6 |
|                           | 7  | 8.393  | -5.2 |
|                           | 8  | 10.038 | -4.9 |
|                           | 9  | 10.14  | -3.7 |
| <b>ALK-I1171N-ATP1-T3</b> |    |        |      |
|                           | 1  | 9.245  | -5.9 |
|                           | 2* | 5.013  | -5.9 |
|                           | 3  | 10.512 | -5.9 |
|                           | 4  | 7.309  | -5.1 |
|                           | 5  | 3.413  | -5   |
|                           | 6  | 5.081  | -4.3 |
|                           | 7  | 3.984  | -4.2 |
|                           | 8  | 7.398  | -4.1 |
|                           | 9  | 9.883  | -3   |

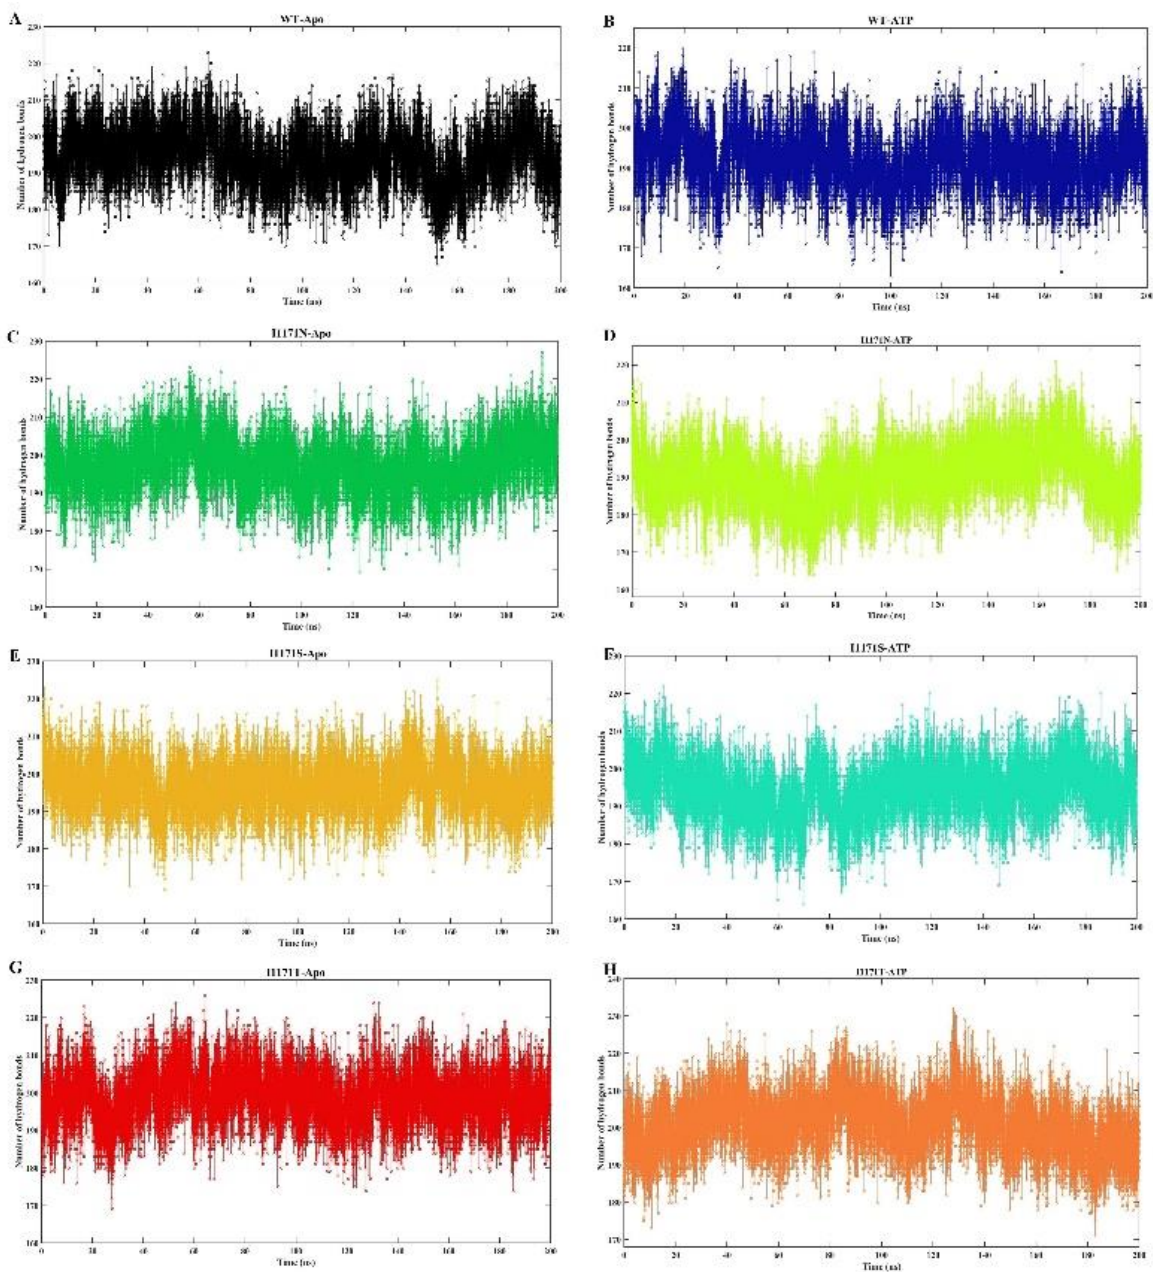

**Supplementary Figure 1.** The intramolecular hydrogen bond analysis of ALK WT and I1171N/S/T mutations in Apo and ATP bound states. The intramolecular hydrogen bond analysis for (A) WT-Apo showed in black, (B) WT-ATP showed in navy blue, (C) I1171N-Apo showed in green, (D) I1171N-ATP showed in pear, (E) I1171S-Apo showed in mustard, (F) I1171S-ATP showed in cyan, (G) I1171T-Apo showed in red, and (H) I1171T-ATP showed in orange. The X-axis denotes time in ns, and the Y-axis displays H-bonds in number.

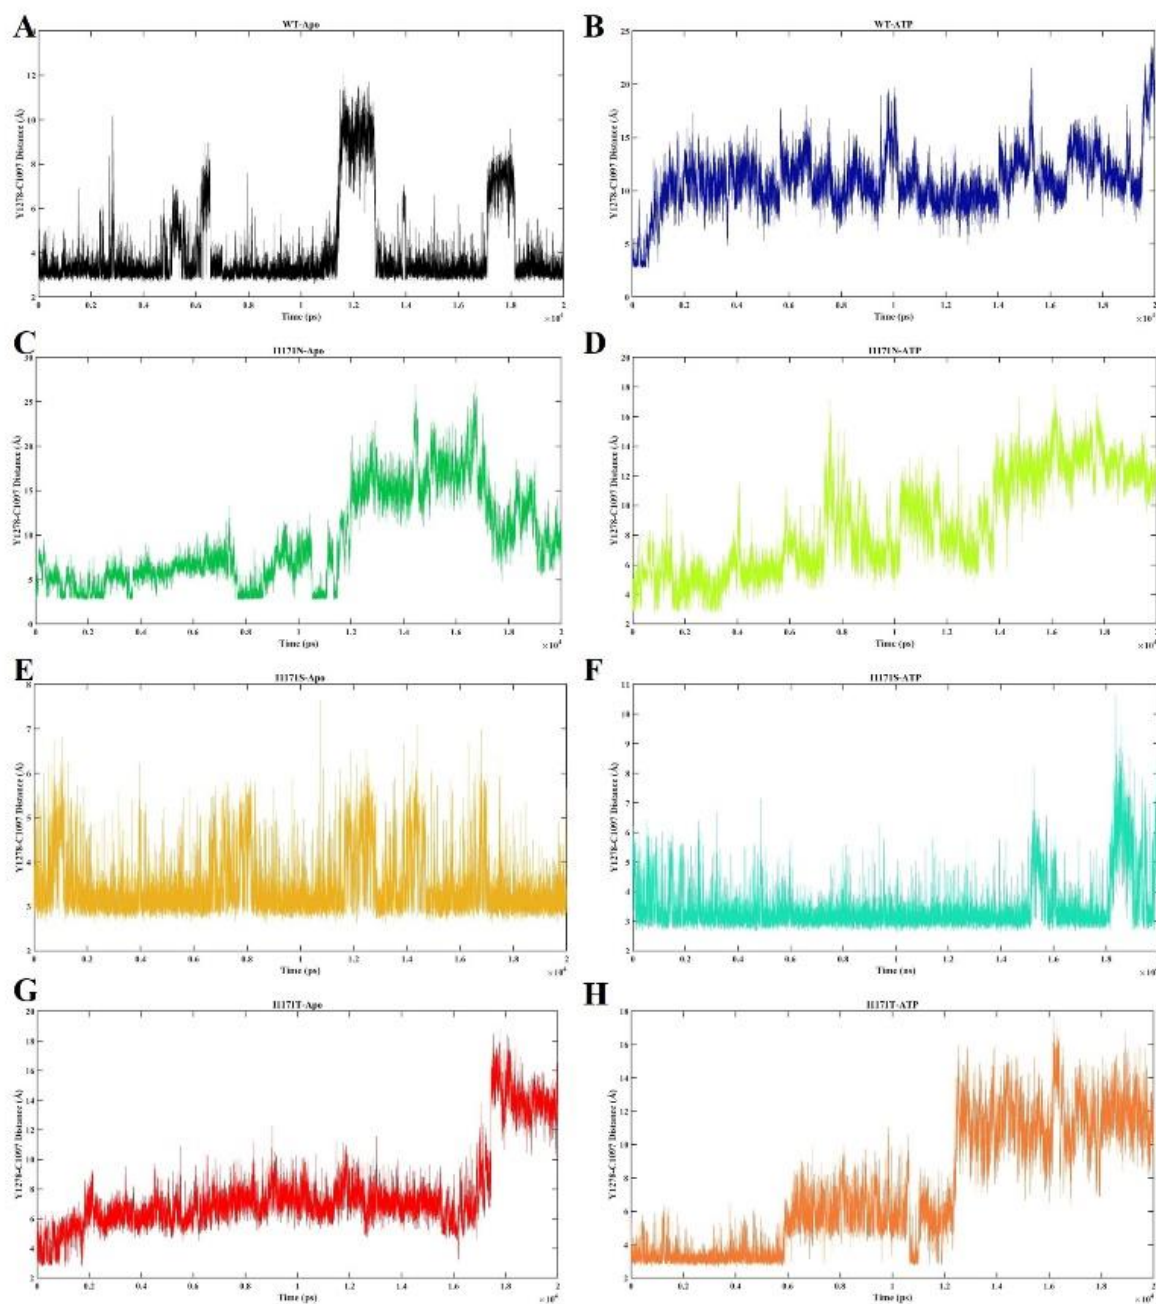

**Supplementary Figure 2.** The distance between the Y1278 and C1097 of ALK WT and I1171N/S/T mutations in Apo and ATP bound states throughout the MD trajectories. The distance between the Y1278-C1097 for (A) WT-Apo, (B) WT-ATP, (C) I1171N-Apo, (D) I1171N-ATP, (E) I1171S-Apo, (F) I1171S-ATP, (G) I1171T-Apo, and (H) I1171T-ATP. The X-axis denotes time in ps, and the Y-axis displays distance in Å.



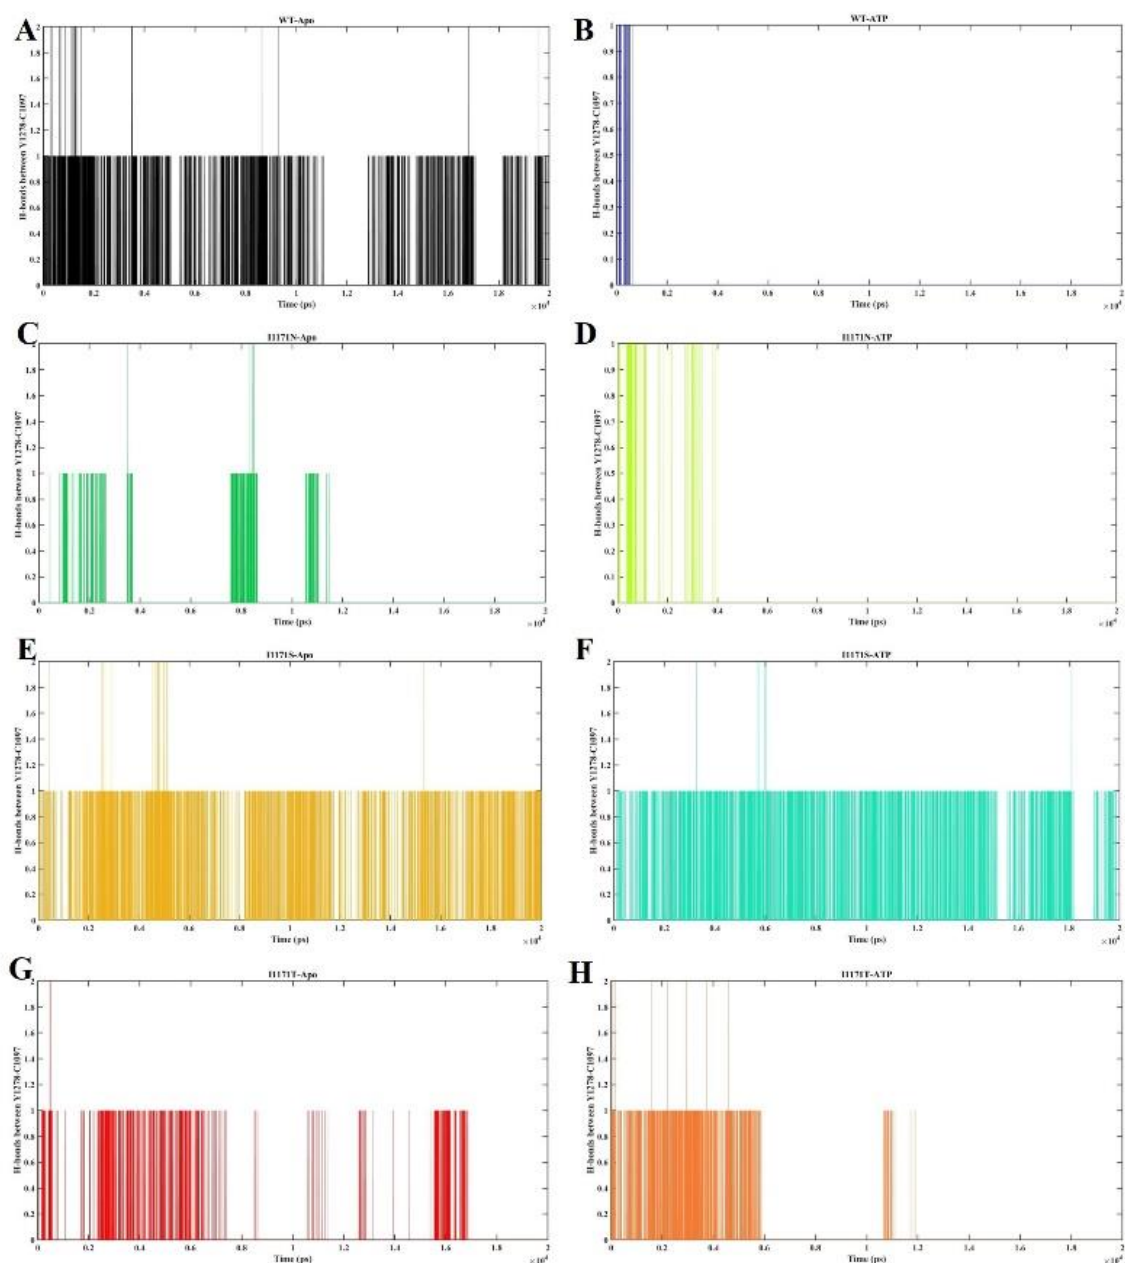

**Supplementary Figure 3.** The H-bonds formed between the Y1278-C1097 of ALK WT and I1171N/S/T mutations in Apo and ATP bound states. The h-bonds formed between the Y1278-C1097 for (A) WT-Apo, (B) WT-ATP, (C) I1171N-Apo, (D) I1171N-ATP, (E) I1171S-Apo, (F) I1171S-ATP, (G) I1171T-Apo, and (H) I1171T-ATP. The X-axis denotes time in ps, and the Y-axis displays the number of h-bonds formed.

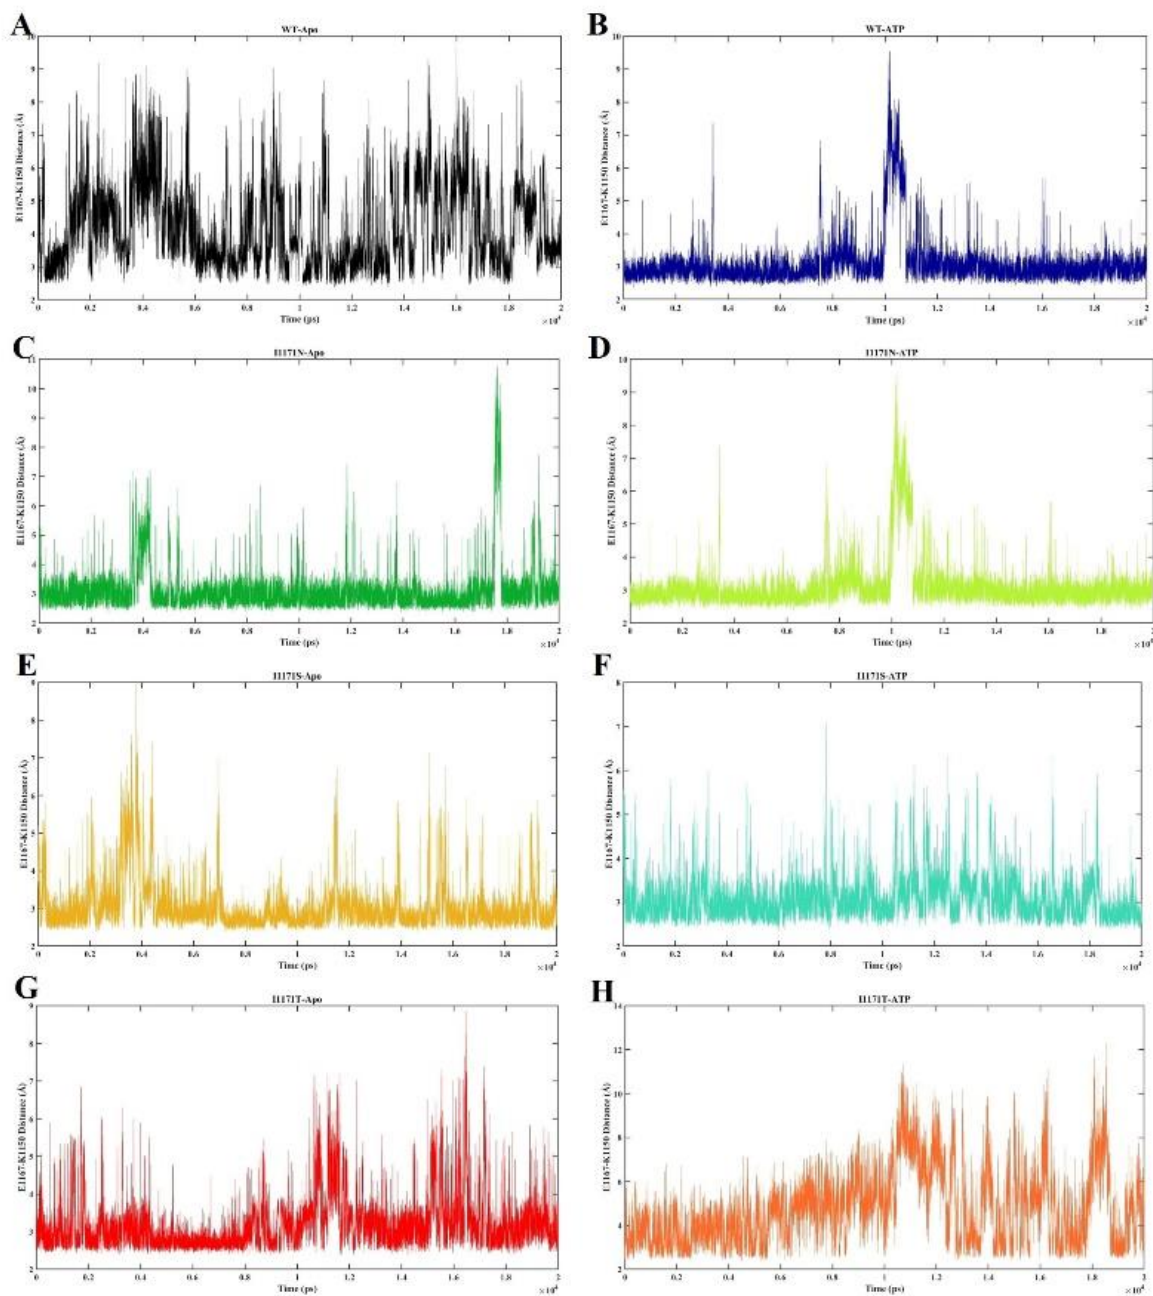

**Supplementary Figure 4.** The salt bridge distance between E167-K1150 of ALK WT and I1171N/S/T mutations in Apo and ATP bound states throughout the MD trajectories. The salt-bridge distance between the E167-K1150 for (A) WT-Apo, (B) WT-ATP, (C) I1171N-Apo, (D) I1171N-ATP, (E) I1171S-Apo, (F) I1171S-ATP, (G) I1171T-Apo, and (H) I1171T-ATP. The X-axis denotes time in ps, and the Y-axis displays distance in Å.

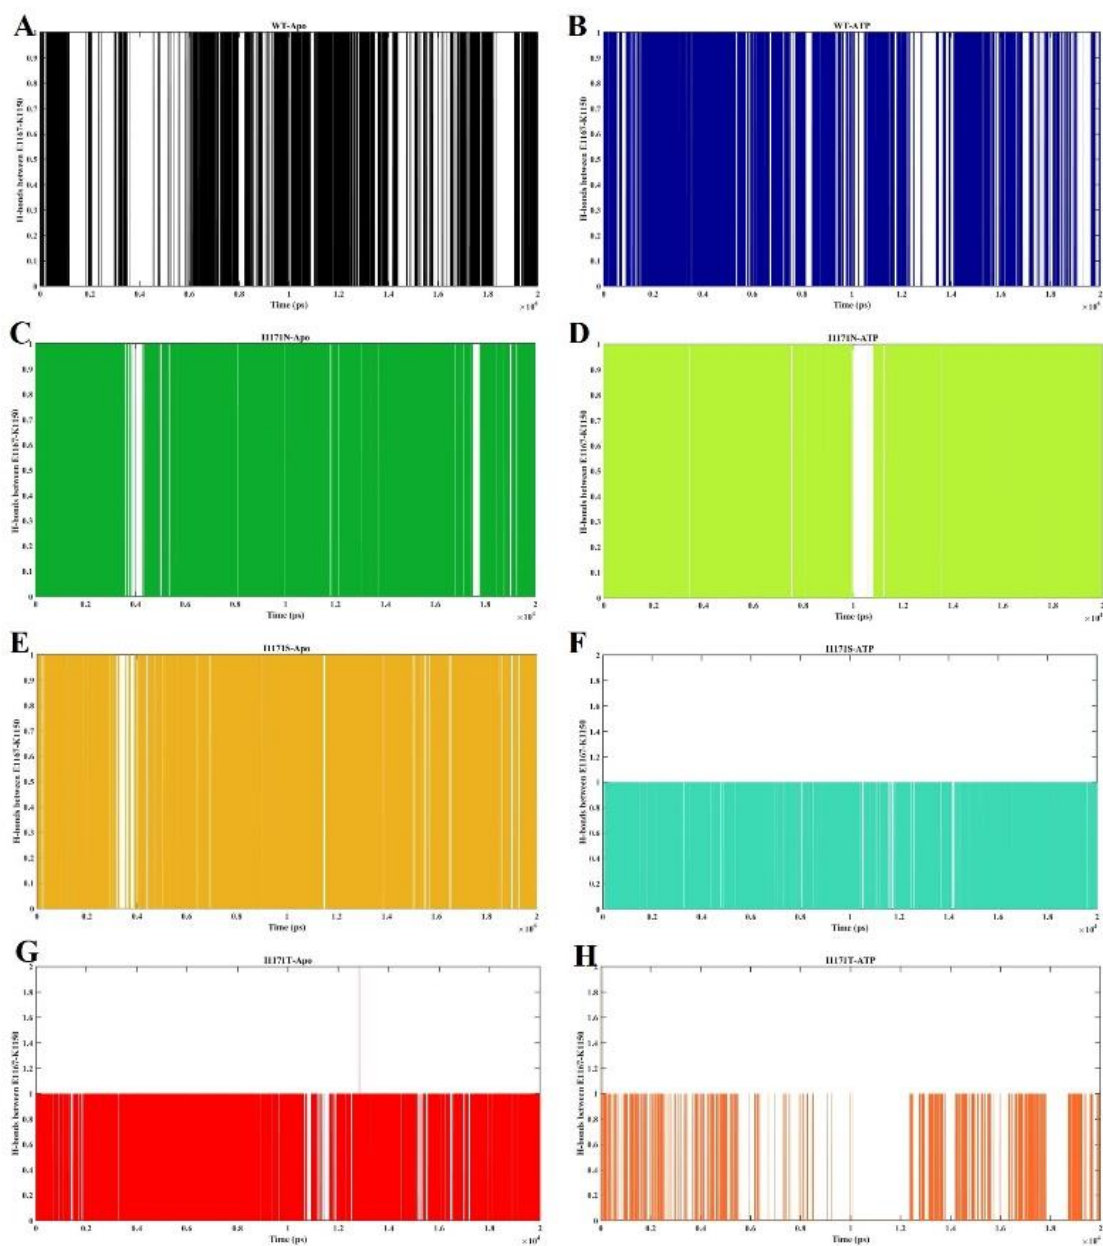

**Supplementary Figure 5.** The H-bonds formed between the E167-K1150 of ALK WT and I1171N/S/T mutations in Apo and ATP bound states. The h-bond formed between the E167-K1150 for (A) WT-Apo, (B) WT-ATP, (C) I1171N-Apo, (D) I1171N-ATP, (E) I1171S-Apo, (F) I1171S-ATP, (G) I1171T-Apo, and (H) I1171T-ATP. The X-axis denotes time in ps, and the Y-axis displays the number of h-bonds formed.

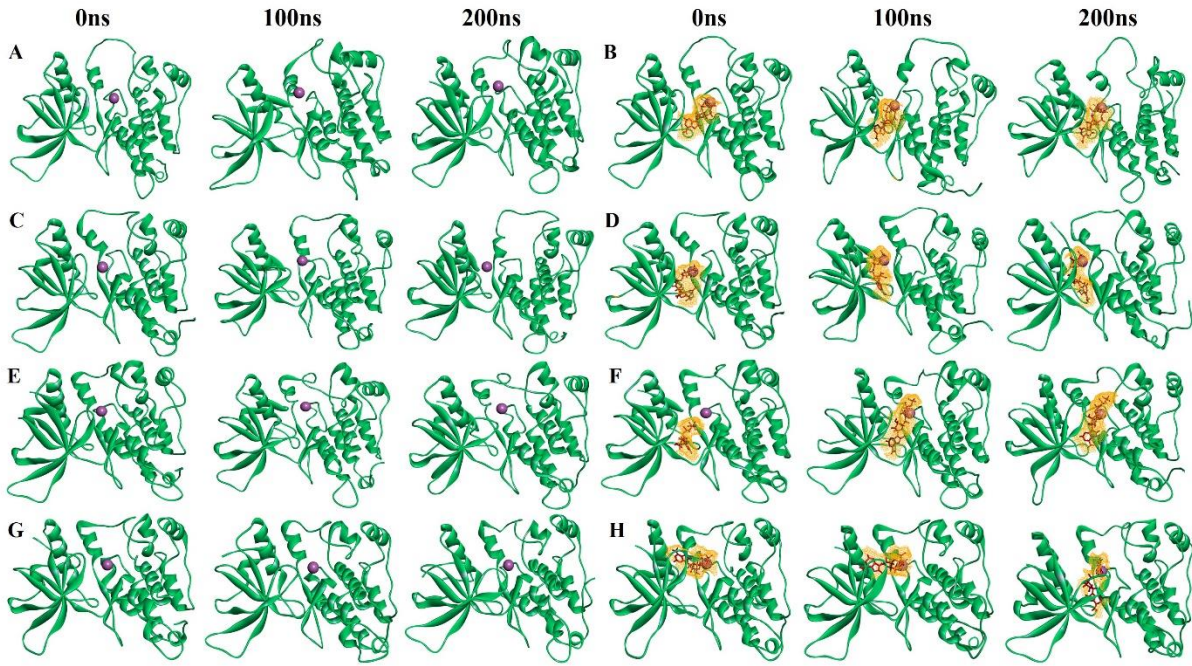

**Supplementary Figure 6.** The cartoon illustration of snapshots of the structures were extracted from trajectories at 100ns intervals of the ALK WT and I1171N/S/T mutations in Apo and ATP bound states over the entire simulations.

## Overall percentage of secondary structures

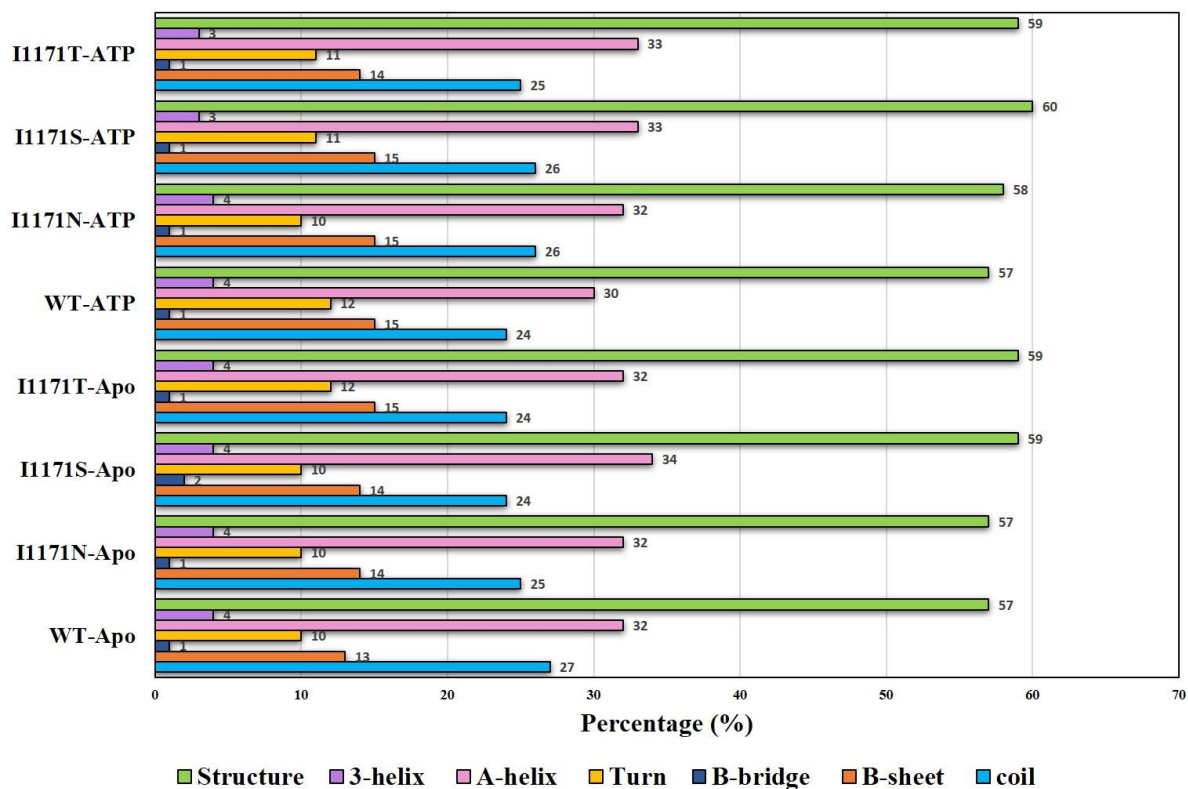

**Supplementary Figure 7.** The overall percentage of secondary structures for ALK WT and I1171N/S/T mutations in Apo and ATP bound states. The structure includes A-helix, B-sheet, B-bridge, and Turn.
